# Supplementary material
Source: publisher figshare collection journal article supplement (https://acs.figshare.com/ndownloader/files/20103932)
Supplement: Supplementary file 1 [file 20103932]

# Enhancing the thermoelectric properties of 2D $\text{Bi}_2\text{Se}_3$ by 1D texturing with graphene

*Jen-Kai Wu, Mario Hofmann, Wen-Pin Hsieh, Szu-Hua Chen, Zhi-Long Yen, Sheng-Kuei Chiu, Yi-Ru Luo, Yuan-Huei Chang\*, Ya-Ping Hsieh\**

Mr. Jen-Kai Wu, Ms. Szu-Hua Chen, Mr. Zhi-Long Yen, Prof. Mario Hofmann, Prof. Yuan-Huei

Chang, Department of Physics, National Taiwan University, Taipei 10617, Taiwan

Prof. Mario Hofmann, Prof. Yuan-Huei Chang

Graduate Institute of Applied Physics, National Taiwan University, Taipei 10617, Taiwan

Prof. Wen-Pin Hsieh

Institute of Earth Sciences, Academia Sinica, Taipei 11529, Taiwan

Dr. Sheng-Kuei Chiu, Prof. Ya-Ping Hsieh

Institute of Atomic and Molecular Sciences, Academia Sinica, Taipei 10617, Taiwan

Email: [yphsieh@gate.sinica.edu.tw](mailto:yphsieh@gate.sinica.edu.tw) (Y. P. Hsieh)

Mr. Yi-Ru Luo

Institute of Opto-Mechatronics, National Chung Cheng University, Chiayi 62102, Taiwan

## **Corresponding Author**

\*Prof. Y. H. Chang Email: [yhchang@phys.ntu.edu.tw](mailto:yhchang@phys.ntu.edu.tw)

\*Prof. Y. P. Hsieh Email: [yphsieh@gate.sinica.edu.tw](mailto:yphsieh@gate.sinica.edu.tw)

## 1. Crystallinity

A typical logarithmic XRD pattern of BSG can be seen in the Figure S1. The sharp (003) family peaks indicates a crystalline Nano-flakes, and all (003) family can be indexed for rhombohedral structure of  $\text{Bi}_2\text{Se}_3$  with  $R\bar{3}m$  space group with lattice parameters  $c = 28.57 \text{ \AA}$ .<sup>1</sup> There is obviously no impurity peak detected which implies that high quality of  $\text{Bi}_2\text{Se}_3$  deposited on graphene.

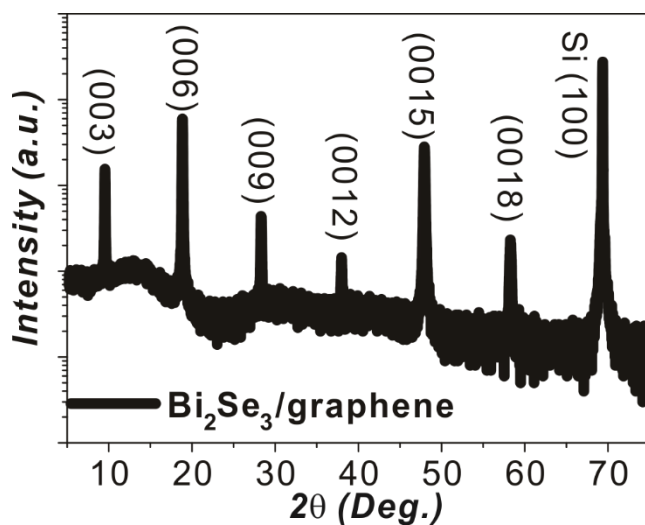

Figure S1. The XRD patterns of BSG.

## 2. Stoichiometric Composition

To understand the chemical stoichiometry of our BSG, XPS spectra (with Mg  $K\alpha$ /Al  $K\alpha$  x-ray source) were analyzed. Figure S2a shows the selenium 3d spectra which consists of two peaks, 53.5 eV and 54.4 eV that correspond to Se  $3d_{5/2}$  and Se  $3d_{3/2}$ , respectively. The XPS spectra of Bi 4f core level as shown in the Figure S3b, which reveals two spin-orbit doublet components with peak position at about 158.1 eV and 163.4 eV that corresponds to Bi  $4f_{7/2}$  and Bi  $4f_{5/2}$ , respectively. The spin orbit doublet a weak intensity peak additionally

overlapped with the spectrum of Bi 4f spectra and fitted by Gaussian function which corresponds to Se 3p<sub>3/2</sub> (159.3 eV) and Se 3p<sub>1/2</sub> (164.8 eV). The phenomenon is consistent with previous reports that regions of Bi 4f and Se 3d have well separated spin-orbit components which are  $\Delta = 5.3$  eV and  $\Delta = 0.86$  eV.<sup>2</sup> We use CASAXPS software to analyze the chemistry stoichiometry of Bi and Se. The ratio of the atomic percentage of  $a_{Bi}$  and  $a_{Se}$  can be estimated through the following equation:

$$a_{Bi} : a_{Se} = \frac{A_{Bi4f}}{S_{Bi4f}} : \frac{A_{Se3d}}{S_{Se3d}},$$

where  $a$  is the atomic percentage,  $A$  is area of the integrated intensity, and  $S$  is the atomic sensitivity factor, which convert the relative peak areas to the relative numbers of atoms in the detected area.<sup>3</sup> By introducing the calculated areas of Bi 4f and Se 3d with  $S_{Bi4f}$  (9.14) and  $S_{Se3d}$  (0.853) for x-ray sources at 54.7°, we obtain the atomic percentage of Bi and Se is 40.96 % to 59.04 % which is very close to 2 to 3. Thus, XPS spectrum demonstrates our sample possesses pure Bi<sub>2</sub>Se<sub>3</sub> Nano-flakes grown on G/SiO<sub>2</sub>/Si substrate.

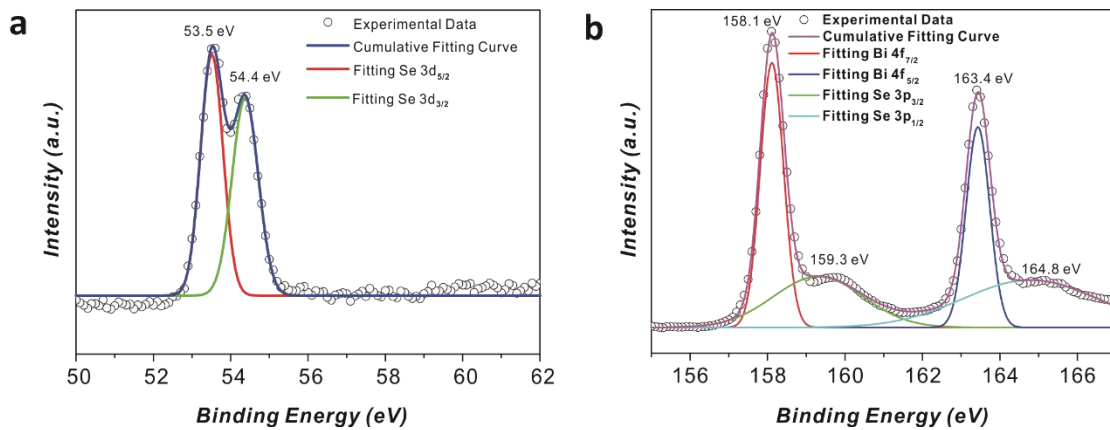

**Figure S2.** The electron core level of (a) Se 3p and (b) Bi 4f.

### 3. Extraction of thermal conductance from Seebeck voltage vs. temperature and comparison to experimental results

Following Roh *et al.*,<sup>4</sup> we characterize the Seebeck voltage as a function of sample

temperature and obtain a linear relationship that is divided into slope (a) and intercept(b).

$$\Delta V_{SB} = \frac{\alpha^2 T I}{G} - \frac{I^2 \alpha R_M}{2G} = aT + b$$

Using the experimentally obtained values in Figure 2(b) we can extract a ratio of thermal conductance ( $G$ ) for 3D and 2D Bi<sub>2</sub>Se<sub>3</sub> samples.

$$\frac{G_{3D}}{G_{2D}} = \frac{a_{3D} R_{3D}^2 b_{2D}^2}{a_{2D} R_{2D}^2 b_{3D}^2}$$

We obtain a thermal conductance ratio of approximately 1.05 which is in relatively good agreement with the extracted thermal conductance ratio (1.5).

#### 4. Extraction of Seebeck coefficient from Seebeck voltage vs. temperature and comparison to experimental results

Using the same approach, we can extract the Seebeck coefficient for 2D  $\text{Bi}_2\text{Se}_3$

$$\alpha = \frac{aIR}{2b} \sim 20 \frac{\mu\text{V}}{\text{K}}$$

This result agrees well with the value measured on macroscopic samples ( $32.053 \mu\text{V K}^{-1}$ )

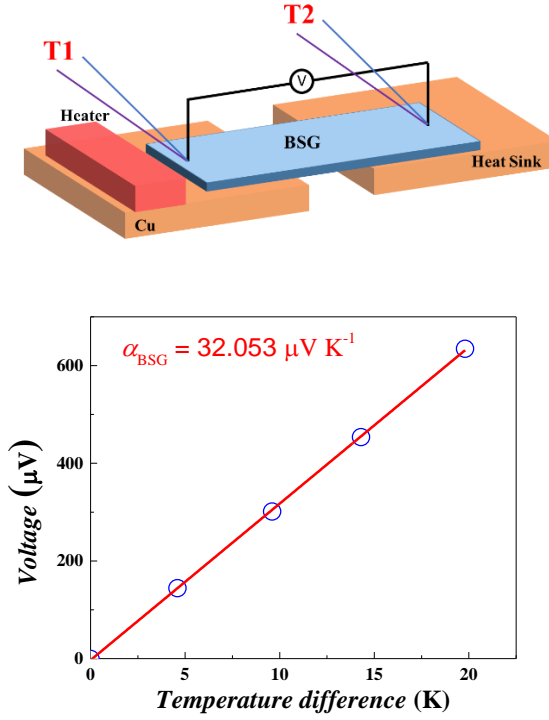

**Figure S3.** The schematic of traditional (differential method) measurement (top) and Seebeck voltage vs. temperature difference of BSG (bottom).

#### 5. Extended AFM characterization

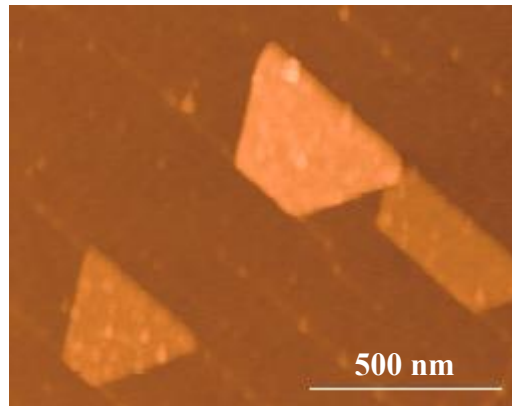

**Figure S4.** Trapezoidal shapes of  $\text{Bi}_2\text{Se}_3$  for longer growth time.

## 6. Schematic of experimental process

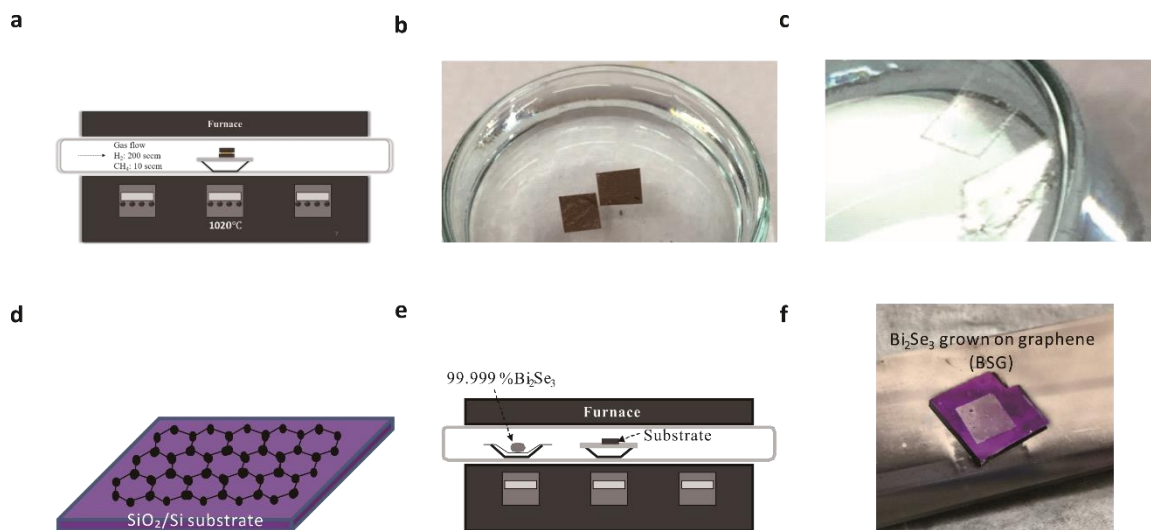

**Figure S5.** (a-e) The schematic diagram and photograph of our experimental setup. (f) The photograph of BSG.

## 7. Electrical conductivity and thermal conductivity changes with temperature

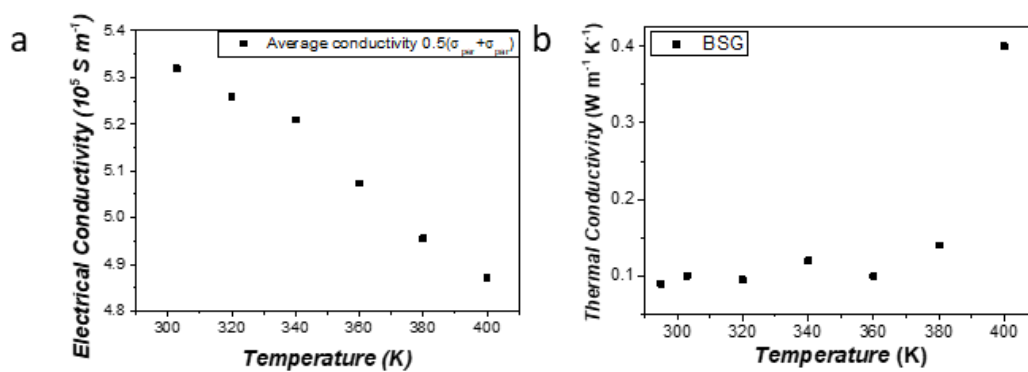

**Figure S6.** (a) Electrical conductivity and (b) thermal conductivity changes with temperature of BSG.

## 8. Schematic of measurement directions

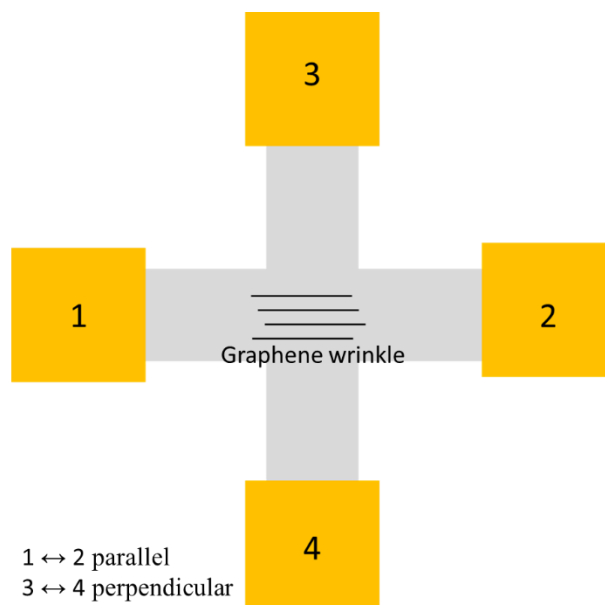

**Figure S7.** The schematic of measurement direction of cross-structure BSG.

## 9. TDTR measurement schematics

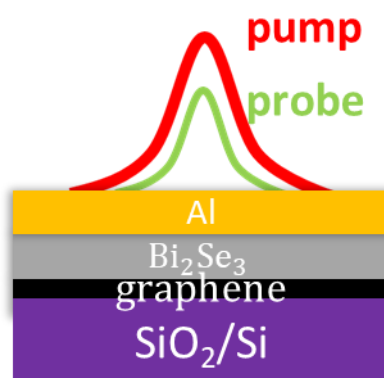

**Figure S8.** The schematic of a typical thin film measured using TDTR technique.

## References

- (1) Zhang, C.; Liu, M.; Man, B. Y.; Jiang, S. Z.; Yang, C.; Chen, C. S.; Feng, D. J.; Bi, D.; Liu, F. Y.; Qiu, H. W.; Zhang, J. X., Facile fabrication of graphene-topological insulator  $\text{Bi}_2\text{Se}_3$  hybrid Dirac materials via chemical vapor deposition in Se-rich conditions. *CrystEngComm* **2014**, *16* (38), 8941-8945.
- (2) Sun, Y.; Cheng, H.; Gao, S.; Liu, Q.; Sun, Z.; Xiao, C.; Wu, C.; Wei, S.; Xie, Y., Atomically Thick Bismuth Selenide Freestanding Single Layers Achieving Enhanced Thermoelectric Energy Harvesting. *J. Am. Chem. Soc.* **2012**, *134* (50), 20294-20297.
- (3) Lee, H.-Y.; Chen, Y.-S.; Lin, Y.-C.; Wu, J.-K.; Lee, Y.-C.; Wu, B.-K.; Chern, M.-Y.; Liang, C.-T.; Chang, Y. H., Epitaxial growth of  $\text{Bi}_2\text{Te}_3$  topological insulator thin films by temperature-gradient induced physical vapor deposition (PVD). *J. Alloys Compd.* **2016**, *686*, 989-997.
- (4) Roh, I.-J.; Lee, Y. G.; Kang, M.-S.; Lee, J.-U.; Baek, S.-H.; Kim, S. K.; Ju, B.-K.; Hyun, D.-B.; Kim, J.-S.; Kwon, B., Harman Measurements for Thermoelectric Materials and Modules under Non-Adiabatic Conditions. *Sci. Rep.* **2016**, *6* (1), 39131.
